# Supplementary material for: Remote Ischemic Preconditioning Acutely Improves Coronary Microcirculatory Function
Source: PubMed Central journal article supplement — J Am Heart Assoc. 2018 Sep 29;7(19):e009058. doi: 10.1161/JAHA.118.009058 (PMC6404904; doi:10.1161/jaha.118.009058), 2018-09-29
Supplement: JAH3-7-e009058-s001.pdf [file JAH3-7-e009058-s001.pdf]

# **SUPPLEMENTAL MATERIAL**

**Figure S1. No change in plasma nitrite with remote ischemic preconditioning.**

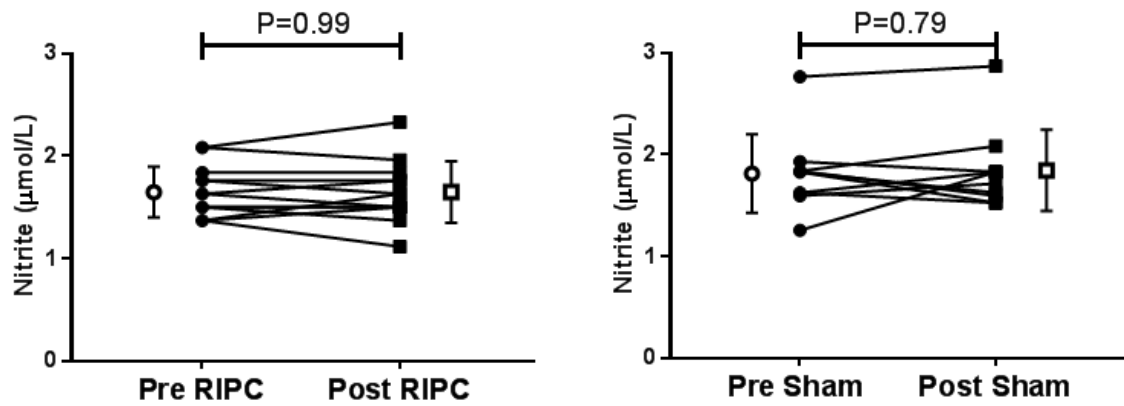

There was no change in plasma nitrite concentration, the major metabolite of nitric oxide, with RIPC or sham treatment. RIPC, n=13; sham, n=10. Open symbols and bars represent mean  $\pm$  SD.

RIPC, remote ischemic preconditioning;

**Figure S2. The effect of remote ischemic preconditioning on the index of microcirculatory resistance with outliers removed.**

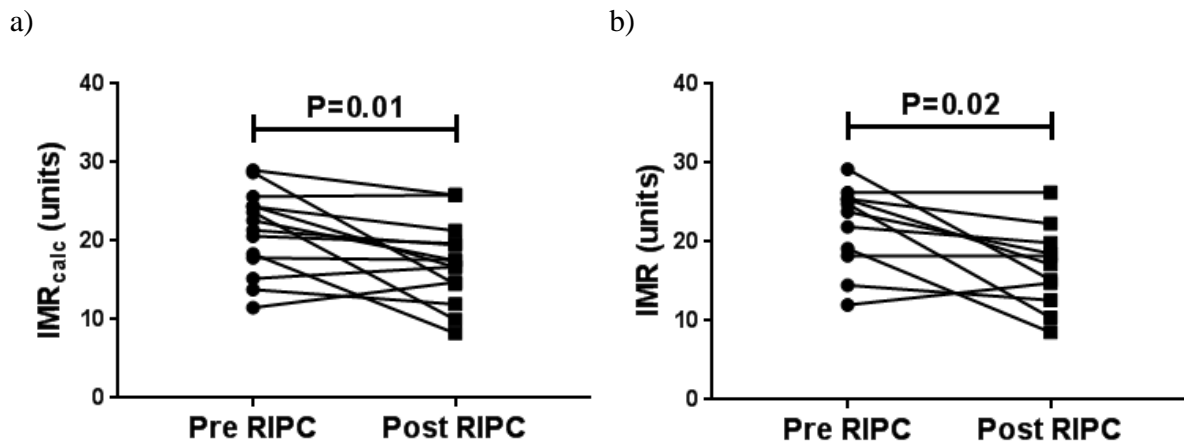

When the outlier in the RIPC arm is removed, the effect of RIPC in reducing  $IMR_{calc}$  (a) and IMR (b) persists.  $IMR_{calc}$ ,  $n=14$ ; IMR,  $n=11$ . Open symbols and bars represent mean  $\pm$  SD.

IMR, index of microcirculatory resistance;  $IMR_{calc}$ , calculated index of microcirculatory resistance; RIPC, Remote ischemic preconditioning;
